# Supplementary material for: Phytic acid functionalized magnetic bimetallic metal–organic frameworks for phosphopeptide enrichment
Source: Royal Society of Chemistry journal article supplement (doi:10.1039/d0tb02517h), 2021-01-01
Supplement: d0tb02517h1.pdf [file d0tb02517h1.pdf]

## Supporting information

### Phytic acid functionalized bimetallic-based magnetic metal-organic frameworks for phosphopeptide enrichment

Shuang Yan, Bin Luo, Jia He, Fang Lan\* and Yao Wu\*

National Engineering Research Center for Biomaterials, Sichuan University, Chengdu  
610064, China

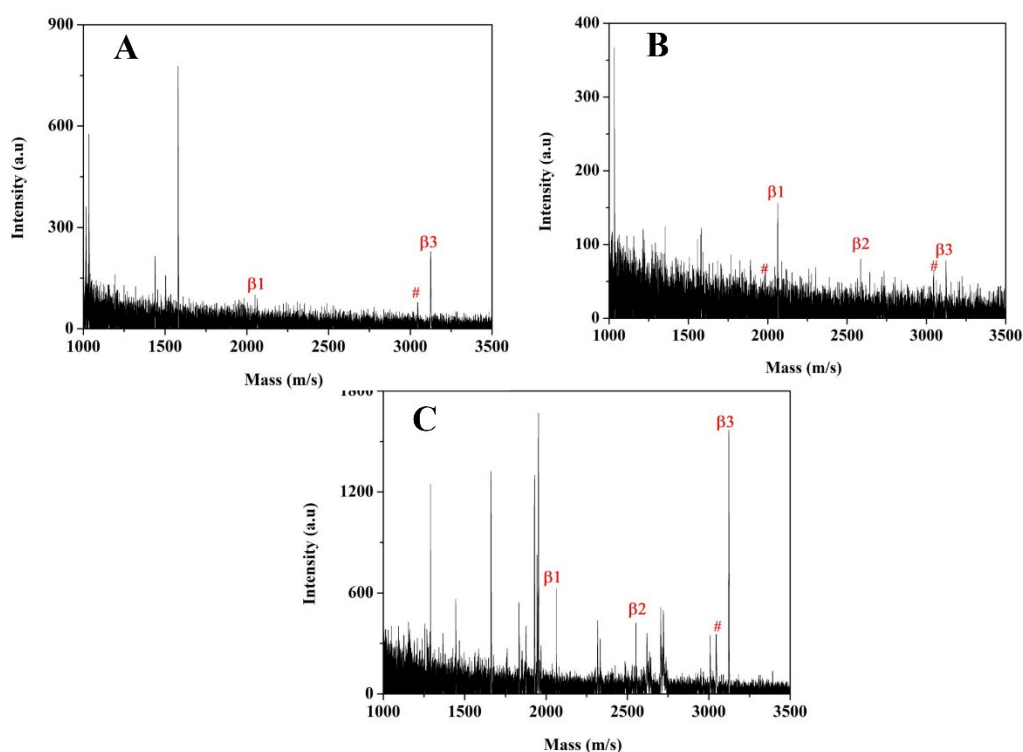

Figure S1. MALDI-TOF mass spectra of tryptic digests from  $\beta$ -casein ( $10^{-9}$  M) after enrichment by loading buffer (ACN/H<sub>2</sub>O/TFA=50/48/2) and elution (0.4 M NH<sub>3</sub>·H<sub>2</sub>O) (A) Fe<sub>3</sub>O<sub>4</sub>@SiO<sub>2</sub>@Ce<sub>0.05</sub>-Zr-MOF@PA, (B) Fe<sub>3</sub>O<sub>4</sub>@SiO<sub>2</sub>@Ce<sub>0.45</sub>-Zr-MOF@PA, (C) Fe<sub>3</sub>O<sub>4</sub>@SiO<sub>2</sub>@Ce<sub>0.3</sub>-Zr-MOF@PA respectively. (#, dephosphorylated peptide)

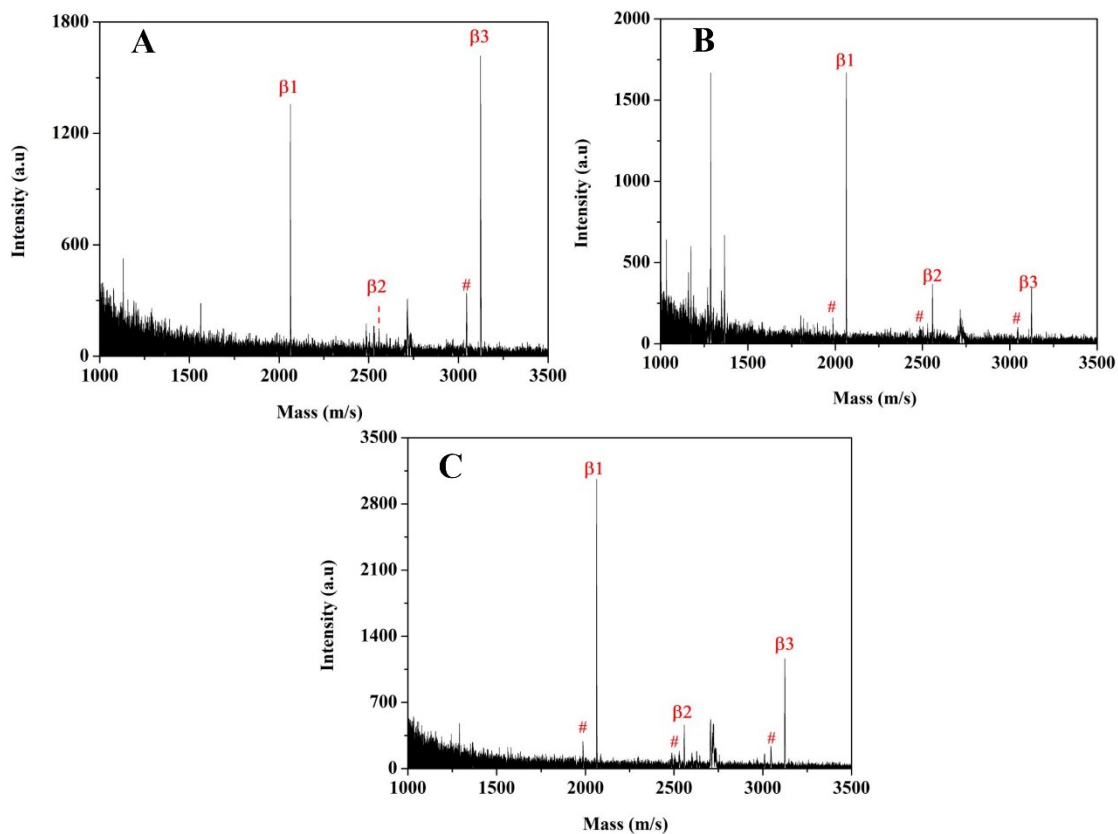

Figure S2. MALDI-TOF mass spectra of tryptic digests from  $\beta$ -casein ( $10^{-9}$  M) after enrichment by loading buffer (ACN/H<sub>2</sub>O/TFA=50/48.5/1.5) and elution (0.4 M NH<sub>3</sub>·H<sub>2</sub>O) (A) Fe<sub>3</sub>O<sub>4</sub>@SiO<sub>2</sub>@Ce<sub>0.05</sub>-Zr-MOF@PA, (B) Fe<sub>3</sub>O<sub>4</sub>@SiO<sub>2</sub>@Ce<sub>0.45</sub>-Zr-MOF@PA, (C) Fe<sub>3</sub>O<sub>4</sub>@SiO<sub>2</sub>@Ce<sub>0.3</sub>-Zr-MOF@PA respectively. (#, dephosphorylated peptide)

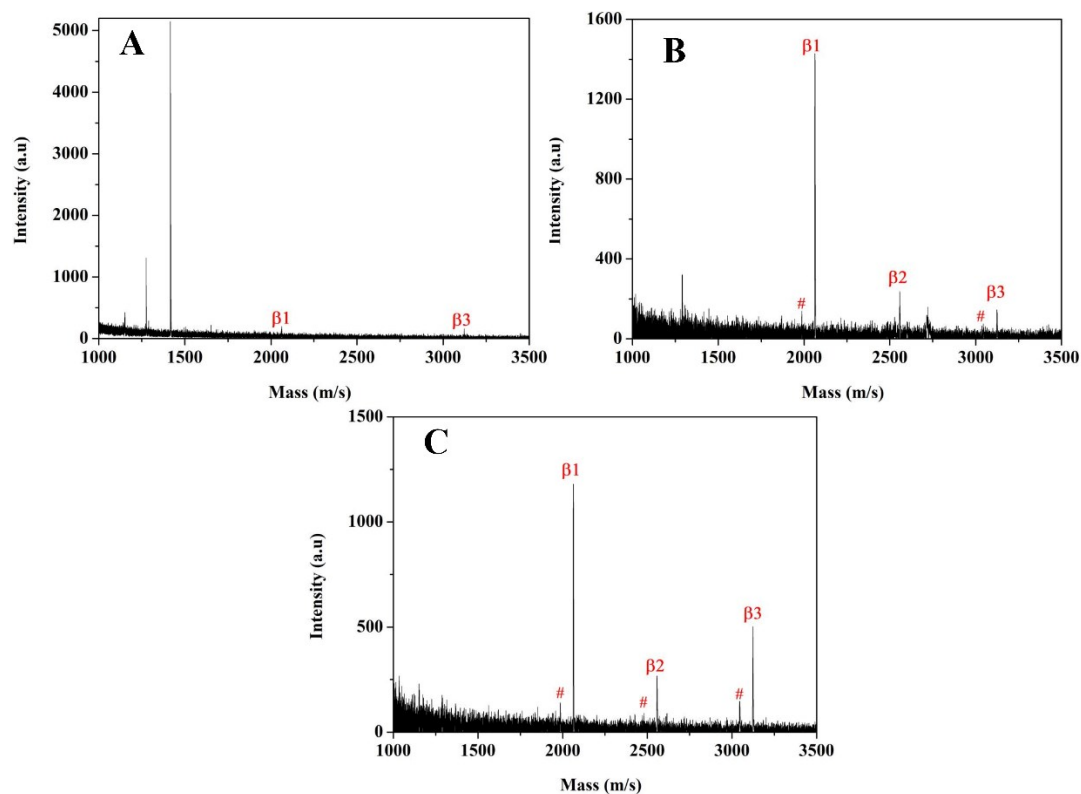

Figure S3. MALDI-TOF mass spectra of tryptic digests from  $\beta$ -casein ( $10^{-9}$  M) after enrichment by loading buffer (ACN/H<sub>2</sub>O/TFA=50/49/1) and elution (0.4 M NH<sub>3</sub>·H<sub>2</sub>O) (A) Fe<sub>3</sub>O<sub>4</sub>@SiO<sub>2</sub>@Ce<sub>0.05</sub>-Zr-MOF@PA, (B) Fe<sub>3</sub>O<sub>4</sub>@SiO<sub>2</sub>@Ce<sub>0.45</sub>-Zr-MOF@PA, (C) Fe<sub>3</sub>O<sub>4</sub>@SiO<sub>2</sub>@Ce<sub>0.3</sub>-Zr-MOF@PA respectively. (#, dephosphorylated peptide)

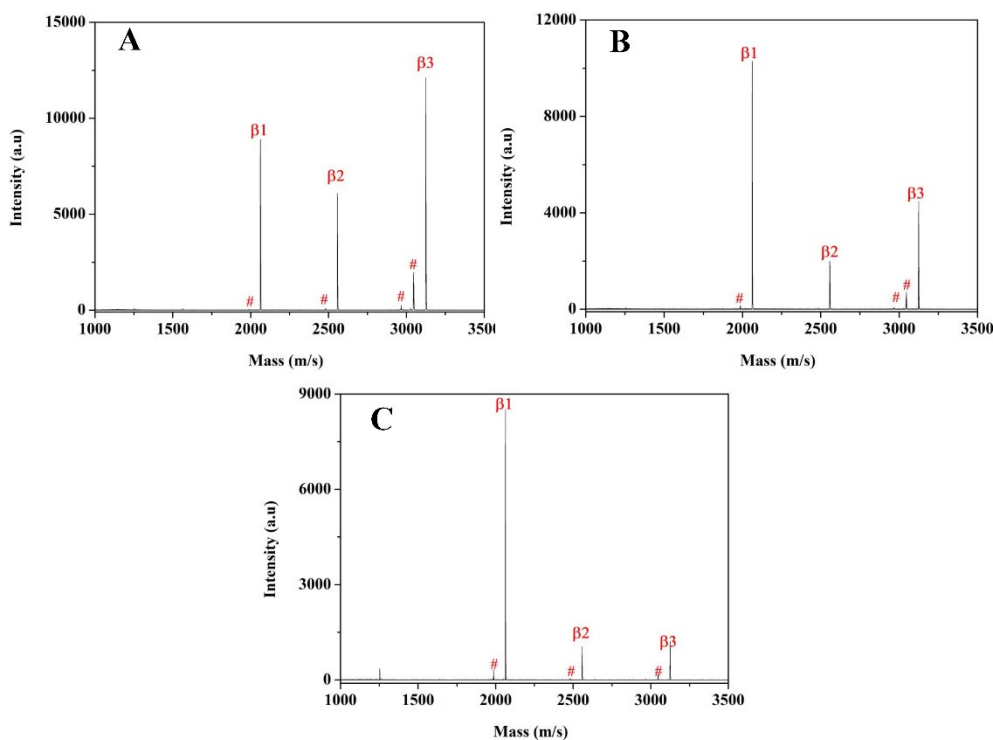

Figure S4. MALDI mass spectra of  $\beta$ -casein digest ( $10^{-6}$  M) after enrichment by  $\text{Fe}_3\text{O}_4@\text{SiO}_2@\text{Ce-Zr-MOF}@PA$  in 50%ACN-1%TFA, 0.4 M  $\text{NH}_3\cdot\text{H}_2\text{O}$ . (A) Cycling 1st, (B) cycling 3rd, and (C) cycling 5th (#, dephosphorylated peptide).

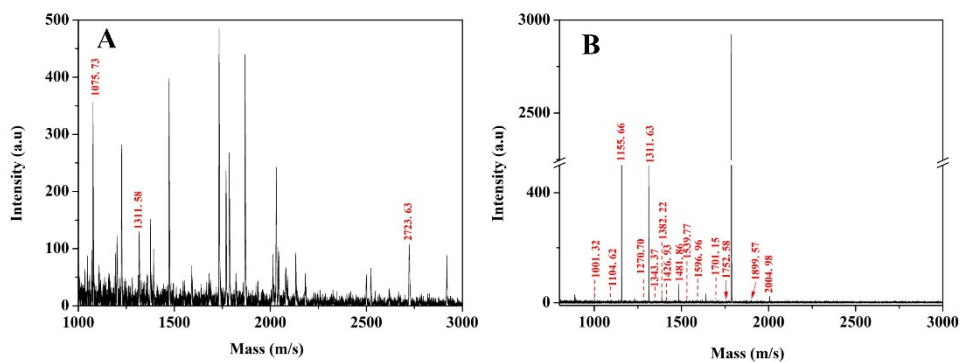

Figure S5. MALDI mass spectra of human saliva before (A) and after (B) enrichment by  $\text{Fe}_3\text{O}_4@\text{SiO}_2@\text{Ce-Zr-MOF}@PA$ . The peaks of phosphopeptides were marked with asterisks.

Table S1. Detail information of the observed phosphopeptides obtained from tryptic digest of  $\alpha$ -casein after enrichment by  $\text{Fe}_3\text{O}_4@\text{SiO}_2@\text{Ce-Zr-MOF}@PA$  in MALDI-TOF MS analysis

| No. | Observed m/z | Peptides sequence | Number of phosphorylation |
|-----|--------------|-------------------|---------------------------|
|-----|--------------|-------------------|---------------------------|

|    |         |                                             |   |
|----|---------|---------------------------------------------|---|
| 1  | 1237.66 | TVDME[pS]TEVF                               | 1 |
| 2  | 1411.45 | EQL[pS]T[pS]EENSK                           | 2 |
| 3  | 1467.32 | TVDME[pS]TEVFIK                             | 1 |
| 4  | 1662.30 | VPQLEIVPN[pS]AEER                           | 1 |
| 5  | 1833.44 | YLGEYLIVPN[pS]AEER                          | 1 |
| 6  | 1847.68 | DIGSE[pS]TEDQAMEDIK                         | 1 |
| 7  | 1927.28 | DIG[pS]E[pS]TEDQAMEDIK                      | 2 |
| 8  | 1943.28 | DIG[pS]E[pS]TEDQA[Mo]EDI<br>K               | 2 |
| 9  | 1952.54 | YKVPQLEIVPN[pS]AEER                         | 1 |
| 10 | 2490.02 | AMKPWIQPKTKVIP[pY]VR[p<br>Y]L               | 2 |
| 11 | 2576.03 | Q[Mo]EAE[pS]I[pS][pS]SEEIV<br>PNSVEQK       | 3 |
| 12 | 2607.45 | EDVPSE[pY]LG[pY]LEQLL<br>RLKK               | 2 |
| 13 | 2618.10 | NTMEHV[pS][pS][pS]EESII[p<br>S]QETKYK       | 4 |
| 14 | 2677.46 | VNEL[pS]KDIG[pS]E[pS]TED<br>QAMEDIK         | 3 |
| 15 | 2703.04 | QMEAE[pS]I[pS][pS][pS]EEIV<br>PN[pS]VEQK    | 5 |
| 16 | 2720.04 | Q[Mo]EAE[pS]I[pS][pS][pS]EE<br>IVPN[pS]VEQK | 5 |
| 17 | 2746.14 | HIQKEDVP[pS]ER[pY]LGYL<br>EQLLR             | 2 |
| 18 | 2927.68 | RELEELNVPGEIVESL[pS][pS<br>][pS] EESITR     | 3 |
| 19 | 2934.14 | KEKVNEL[pS]KDIG[pS]E[pS]<br>TEDQAMEDIKQ     | 3 |
| 20 | 2965.26 | RELEELNVPGEIVE[pS]L[pS][<br>pS][pS]EESITR   | 4 |
| 21 | 3007.09 | NANEEYSIG[pS][pS][pS]EE[<br>pS]AEVATEEVK    | 4 |
| 22 | 3041.79 | RELEELNVPGEIVE[pS]L[pS][<br>pS]SEESITR      | 3 |
| 23 | 3087.95 | NANEEY[pS]IG[pS][pS][pS]<br>EE[pS]AEVATEEVK | 5 |
| 24 | 3122.31 | RELEELNVPGEIVE[pS]L[pS][<br>pS][pS]EESITR   | 4 |

Table S2. Detailed information of the detected phosphorylated peptides from non-fat milk digest after enriched by Fe<sub>3</sub>O<sub>4</sub>@SiO<sub>2</sub>@Ce-Zr-MOF@PA in MALDI-TOF MS analysis.

| <b>m/z(Da)</b> | <b>Number of phosphate groups</b> | <b>Peptide sequence</b>                                      |
|----------------|-----------------------------------|--------------------------------------------------------------|
| 3121.12        | 4                                 | RELEELNVPGEIVE[pS]L[pS][pS][pS]EESITR                        |
| 3022.97        | 3                                 | RELEELNVPGEIVESL[pS] [pS][pS]EESITR                          |
| 3007.82        | 4                                 | NANEEEEYSIG[pS] [pS] [pS]EE[pS]AEVATEESITR                   |
| 2963.98        | 4                                 | ELEELNVPGEIVE[pS]L[pS][pS][pS]EESITR                         |
| 2950.13        | 3                                 | KEKVNEL[pS]KDIG[pS]E[pS]TEDQA[Mo]EDIKQ                       |
| 2934.10        | 3                                 | EKVNEL[pS]KDIG[pS]E[pS]TEDQAMEDI                             |
| 2866.03        | 2                                 | KVNELSKDIG[pS]E[pS]TEDQAMEDIKQ                               |
| 2808.25        | 3                                 | KVNEL[pS]KDIG[pS]E[pS]TEDQAMEDIK                             |
| 2720.90        | 5                                 | QMEAE [pS]L[pS] [pS] [pS]EEIVPN [pS] VEQK                    |
| 2704.91        | 5                                 | QMEAE [pS]L[pS] [pS] [pS]EEIVPN [pS] VEQK                    |
| 2551.76        | 1                                 | FQ[pS]EEQQQTEDELQDKIHPF                                      |
| 2352.20        | 4                                 | NVPGEIVESL[pS][pS][pS]EE[pS]ITR                              |
| 1926.18        | 2                                 | DIG[pS]E[pS]TEDQAMEDIK                                       |
| 1632.47        | 1                                 | ED [pS]PEVIESPPEIN                                           |
| 1561.39        | 4                                 | RELEELNVPGEIVE[pS]L[pS][pS][pS]EESITR                        |
| 1521.83        | 4                                 | VVRNANEEEEYSI [pS] [pS] [pS]EE [pS]<br>AEVATEEVKITVDDKHYQKAL |
| 1494.51        | 2                                 | RFFVAPFPEVFGKEKVNELSKDIG[pS]E[pS]TEDQA<br>MEDIKQME           |
| 1281.07        | 1                                 | KKIEKFQ[pS]EEQQQTEDELQDKIHPFAQ                               |
| 1163.73        | 1                                 | RINKKIEKFQ [pS]EEQQQTEDELQDKIHPFAQTQS                        |

pS: phosphorylated site.
